# Supplementary material
Source: HighWire-hosted journal article supplement (https://bmjopen.bmj.com/content/7/6/e015402)
Supplement: inline-supplementary-material-1 [file inline-supplementary-material-1.pdf]

## Appendix A. Search Strategy

### Search Strategy:

1. Premature Birth
2. ((preterm or pre-term or premature or pre-mature) and (birth\* or childbirth\* or deliver\* or parturit\*))
3. Fetal Membranes, Premature Rupture
4. pprom
5. Obstetric Labor, Premature
6. ((preterm or pre-term or premature or pre-mature) and (labor or labour))
7. Recurrence
8. recur\* or repeat
9. (1 or 2 or 3 or 4 or 5 or 6) and (7 or 8)

Initial Search Run on June 17, 2015

Updated Search Run on July 29, 2016

Updated Search Run on May 24, 2017

Appendix B. Included studies

Table B1 – Recurrence rate of spontaneous preterm birth

| Author              | Time Period | Country | Study Design | Inclusion/Exclusion Criteria                                                                                                                                                                                                                                            | Gestational Age at Spontaneous Preterm Birth (weeks) |             | Recurrence Rate of Spontaneous Preterm Birth |
|---------------------|-------------|---------|--------------|-------------------------------------------------------------------------------------------------------------------------------------------------------------------------------------------------------------------------------------------------------------------------|------------------------------------------------------|-------------|----------------------------------------------|
|                     |             |         |              |                                                                                                                                                                                                                                                                         | Pregnancy 1                                          | Pregnancy 2 |                                              |
| Ananth 2006 (14)    | 1989-1997   | USA     | Cohort       | <i>Inclusion:</i> Prior sPTB<br><i>Exclusion:</i> Multiple gestation pregnancies                                                                                                                                                                                        | <37                                                  | <37         | 2,626/12,670 (20.7%)                         |
|                     |             |         |              |                                                                                                                                                                                                                                                                         |                                                      | <35         | 698/12,670 (5.5%)                            |
|                     |             |         |              |                                                                                                                                                                                                                                                                         |                                                      | <32         | 164/12,670 (1.3%)                            |
|                     |             |         |              |                                                                                                                                                                                                                                                                         | <35                                                  | <35         | 698/4,463 (15.6%)                            |
|                     |             |         |              |                                                                                                                                                                                                                                                                         | <32                                                  | <32         | 164/2,022 (8.1%)                             |
| Asrat 1991 (15)     |             | USA     | Cohort       | <i>Inclusion:</i> Prior PPRM<br><i>Exclusion:</i> Incompetent cervix, uterine anomalies, diethylstilbestrol exposure, multiple gestations, and neonates with congenital anomalies                                                                                       | <36                                                  | <36         | 39/121 (32.2%)                               |
| Care 2014 (16)      | 2010-2012   | UK      | Cohort       | <i>Inclusion:</i> Prior sPTB or PROM; cervical length >25mm at 20-24 weeks<br><i>Exclusion:</i> Prior cervical surgery, non-viable pregnancy, history of iPTB, cerclage, uterine anomalies, Ehlers-Danlos syndrome, intrauterine death, twins, congenital abnormalities | <34                                                  | <37         | 53/196 (27.0%)                               |
|                     |             |         |              |                                                                                                                                                                                                                                                                         |                                                      | <34         | 32/196 (16.3%)                               |
| Carr-Hill 1985 (17) | unspecified | UK      | Cohort       | <i>Inclusion:</i> Prior sPTB, singleton<br><i>Exclusion:</i> Multiple gestation, stillbirth, induced labor                                                                                                                                                              | <37                                                  | <37         | 76/494 (15.4%)                               |

| Author                | Time Period | Country | Study Design | Inclusion/Exclusion Criteria                                                                                                                                                                                                                                                                                               | Gestational Age at Spontaneous Preterm Birth (weeks) |             | Recurrence Rate of Spontaneous Preterm Birth |
|-----------------------|-------------|---------|--------------|----------------------------------------------------------------------------------------------------------------------------------------------------------------------------------------------------------------------------------------------------------------------------------------------------------------------------|------------------------------------------------------|-------------|----------------------------------------------|
|                       |             |         |              |                                                                                                                                                                                                                                                                                                                            | Pregnancy 1                                          | Pregnancy 2 |                                              |
|                       |             |         |              |                                                                                                                                                                                                                                                                                                                            |                                                      |             |                                              |
| Coleman 2012 (18)     | 2007-2010   | USA     | Cohort       | <i>Inclusion:</i> Prior sPTB, received 17P injections<br><i>Exclusion:</i> Non-compliance with 17P injections                                                                                                                                                                                                              | <37                                                  | <37         | 426/1,183 (36.0%)                            |
|                       |             |         |              |                                                                                                                                                                                                                                                                                                                            |                                                      | <35         | 156/1,183 (13.2%)                            |
|                       |             |         |              |                                                                                                                                                                                                                                                                                                                            |                                                      | <32         | 61/1,183 (5.2%)                              |
| Crane 2008 (19)       | 2000-2006   | Canada  | Cohort       | <i>Inclusion:</i> Prior sPTB<br><i>Exclusion:</i> Cervical cerclage                                                                                                                                                                                                                                                        | <37                                                  | <37         | 21/90 (23.3%)                                |
|                       |             |         |              |                                                                                                                                                                                                                                                                                                                            |                                                      | <35         | 11/90 (12.2%)                                |
|                       |             |         |              |                                                                                                                                                                                                                                                                                                                            |                                                      | <34         | 8/90 (8.9%)                                  |
| Drassinower 2015 (20) | 2009-2014   | USA     | Cohort       | <i>Inclusion:</i> Prior sPTB, singleton<br><i>Exclusion:</i> Multiple gestations, major fetal anomalies, cerclage, history of iPTB or placental abruption                                                                                                                                                                  | <37                                                  | <37         | 178/522 (34.1%)                              |
|                       |             |         |              |                                                                                                                                                                                                                                                                                                                            |                                                      | <34         | 78/522 (14.9%)                               |
|                       |             |         |              |                                                                                                                                                                                                                                                                                                                            |                                                      | <28         | 34/522 (6.5%)                                |
| Ekwo 1998 (21)        | 1988-1993   | USA     | Cohort       | <i>Inclusion:</i> Prior sPTB<br><i>Exclusion:</i> Fetal loss, multiple gestation                                                                                                                                                                                                                                           | <37                                                  | <37         | 56/108 (51.9%)                               |
| Elimian 2016 (22)     | 2007-2010   | USA     | RCT          | <i>Inclusion:</i> Prior sPTB<br><i>Exclusion:</i> Multiple gestation, major fetal anomaly or chromosomal anomalies, prior progesterone use in the current pregnancy, use of heparin in the current pregnancy, uterine anomaly, maternal medical conditions, no ultrasound before 20 <sup>+6</sup> in the current pregnancy | <37                                                  | <37         | 59/145 (40.7%)                               |
|                       |             |         |              |                                                                                                                                                                                                                                                                                                                            |                                                      | <34         | 27/145 (18.6%)                               |
|                       |             |         |              |                                                                                                                                                                                                                                                                                                                            |                                                      | <28         | 15/145 (10.3%)                               |
| Esplin 2008 (23)      | 1989-2001   | USA     | Cohort       | <i>Inclusion:</i> First live birth in Utah and a subsequent live birth in the study period                                                                                                                                                                                                                                 | <37                                                  | <37         | 1663/6,199 (26.8%)                           |
|                       |             |         |              |                                                                                                                                                                                                                                                                                                                            | <34                                                  | <37         | 587/1,669 (35.2%)                            |

| Author                           | Time Period | Country | Study Design | Inclusion/Exclusion Criteria                                                                                                                    | Gestational Age at Spontaneous Preterm Birth (weeks) |             | Recurrence Rate of Spontaneous Preterm Birth |
|----------------------------------|-------------|---------|--------------|-------------------------------------------------------------------------------------------------------------------------------------------------|------------------------------------------------------|-------------|----------------------------------------------|
|                                  |             |         |              |                                                                                                                                                 | Pregnancy 1                                          | Pregnancy 2 |                                              |
|                                  |             |         |              |                                                                                                                                                 |                                                      | <34         | 299/1,669 (17.9%)                            |
| Getahun 2010 (24)<br>*PPROM only | 1989-1997   | USA     | Cohort       | <i>Inclusion:</i> Prior PPRM<br><i>Exclusion:</i> Multiple gestations, births <20 weeks, non White or Black race, >1 pregnancy before 1989      | <37                                                  | <37         | 157/2,259 (6.9%)                             |
|                                  |             |         |              |                                                                                                                                                 | <34                                                  | <34         | 97/1,071 (9.1%)                              |
|                                  |             |         |              |                                                                                                                                                 | <32                                                  | <32         | 67/697 (9.6%)                                |
|                                  |             |         |              |                                                                                                                                                 | <28                                                  | <28         | 22/323 (6.8%)                                |
| Glover 2011 (25)                 | 2006-2009   | USA     | RCT          | <i>Inclusion:</i> Prior sPTB, initiated prenatal care prior to 20 weeks gestation<br><i>Exclusion:</i> Multiple gestations, major fetal anomaly | <37                                                  | <37         | 13/33 (39.4%)                                |
| Goldenberg 2006 (26)             | 1996-2001   | USA     | Cohort       | <i>Inclusion:</i> Prior sPTB                                                                                                                    | <32                                                  | <37         | 71/83 (85.5%)                                |
| Gonzalez-Quintero 2011 (27)      | 2006-2009   | USA     | Cohort       | <i>Inclusion:</i> Prior sPTB, singleton<br><i>Exclusion:</i> iPTB, >1 prior PTB, cerclage in current pregnancy                                  | <37                                                  | <37         | 597/2,123 (28.1%)                            |
|                                  |             |         |              |                                                                                                                                                 |                                                      | <35         | 274/2,123 (12.9%)                            |
|                                  |             |         |              |                                                                                                                                                 |                                                      | <32         | 113/2,123 (5.3%)                             |

| Author            | Time Period | Country | Study Design | Inclusion/Exclusion Criteria                                                                                                                                                                                                                                                                                                                                                                                                                                            | Gestational Age at Spontaneous Preterm Birth (weeks) |             | Recurrence Rate of Spontaneous Preterm Birth |
|-------------------|-------------|---------|--------------|-------------------------------------------------------------------------------------------------------------------------------------------------------------------------------------------------------------------------------------------------------------------------------------------------------------------------------------------------------------------------------------------------------------------------------------------------------------------------|------------------------------------------------------|-------------|----------------------------------------------|
|                   |             |         |              |                                                                                                                                                                                                                                                                                                                                                                                                                                                                         | Pregnancy 1                                          | Pregnancy 2 |                                              |
| Harper 2010 (28)  | 2005-2006   | USA     | RCT          | <i>Inclusion:</i> Prior sPTB, singleton<br><i>Exclusion:</i> Major fetal anomaly, intake of a fish oil supplement >500mg/week at any time during the preceding month, allergy to fish, anticoagulation therapy, hypertension, White's classification D or higher diabetes, drug or alcohol abuse, seizure disorder, uncontrolled thyroid disease, clotting disorder, current or planned cerclage, or a plan to deliver either elsewhere or before 37 weeks of gestation | <37                                                  | <37         | 292/852 (34.3%)                              |
| Himes 2008 (29)   | 2001-2006   | USA     | Cohort       | <i>Inclusion:</i> Prior sPTB placenta pathology information available                                                                                                                                                                                                                                                                                                                                                                                                   | <37                                                  | <37         | 102/245 (41.6%)                              |
| Hsieh 2005 (30)   | 1991-1997   | Taiwan  | Cohort       | <i>Exclusion:</i> Multiple gestation, fetal anomaly, cervical incompetence, stillbirth, iPTB                                                                                                                                                                                                                                                                                                                                                                            | <37                                                  | <37         | 52/228 (22.8%)                               |
| Laughon 2014 (31) | 2002-2010   | USA     | Cohort       | <i>Inclusion:</i> Singleton pregnancies                                                                                                                                                                                                                                                                                                                                                                                                                                 | <37                                                  | <37         | 921/3,139 (29.3%)                            |
| Lykke 2009 (32)   | 1978-2007   | Denmark | Cohort       | <i>Inclusion:</i> Maternal age between 15-50<br><i>Exclusion:</i> Women with cardiovascular disease, type 1 or 2 diabetes, women who emigrated within 3 months of 2nd delivery                                                                                                                                                                                                                                                                                          | <37                                                  | <37         | 2742/17,334 (15.8%)                          |
|                   |             |         |              |                                                                                                                                                                                                                                                                                                                                                                                                                                                                         | <33                                                  |             | 444/1,734 (25.6%)                            |
|                   |             |         |              |                                                                                                                                                                                                                                                                                                                                                                                                                                                                         | <28                                                  |             | 139/535 (26.0%)                              |

| Author            | Time Period | Country | Study Design | Inclusion/Exclusion Criteria                                                                                                                                                                                                                                                    | Gestational Age at Spontaneous Preterm Birth (weeks) |             | Recurrence Rate of Spontaneous Preterm Birth |
|-------------------|-------------|---------|--------------|---------------------------------------------------------------------------------------------------------------------------------------------------------------------------------------------------------------------------------------------------------------------------------|------------------------------------------------------|-------------|----------------------------------------------|
|                   |             |         |              |                                                                                                                                                                                                                                                                                 | Pregnancy 1                                          | Pregnancy 2 |                                              |
| Manuck 2011 (33)  | 2002-2010   | USA     | Cohort       | <i>Inclusion:</i> Prior sPTB, singleton<br><i>Exclusion:</i> History of iPTB or incompetent cervix                                                                                                                                                                              | <35                                                  | <37         | 131/223 (58.7%)                              |
|                   |             |         |              |                                                                                                                                                                                                                                                                                 |                                                      | <32         | 25/223 (11.2%)                               |
| Markham 2014 (34) | 1998-2012   | USA     | Cohort       | <i>Inclusion:</i> Prior sPTB<br><i>Exclusion:</i> Multiple gestations, known uterine anomalies,                                                                                                                                                                                 | <37                                                  | <37         | 459/1,066 (43.1%)                            |
|                   |             |         |              |                                                                                                                                                                                                                                                                                 |                                                      | <35         | 269/1,066 (25.2%)                            |
|                   |             |         |              |                                                                                                                                                                                                                                                                                 |                                                      | <32         | 139/1,066 (13.0%)                            |
| Meis 2003 (35)    | 1999-2002   | USA     | RCT          | <i>Inclusion:</i> Prior sPTB<br><i>Exclusion:</i> Multiple gestations, fetal anomaly, progesterone or heparin treatment during the current pregnancy, current or planned cervical cerclage, hypertension requiring medication, seizure disorder, or a plan to deliver elsewhere | <37                                                  | <37         | 159/463 (34.3%)                              |
| Mercer 1999 (36)  | 1992-1994   | USA     | Cohort       | <i>Inclusion:</i> Singleton<br><i>Exclusion:</i> Placenta previa, major fetal malformations, cervical cerclage, polyhydramnios, oligohydramnios, cervical dilatation of $\geq 2$ cm for nulliparous women and $\geq 3$ cm for multiparous women.                                | <37                                                  | <37         | 89/410 (21.7%)                               |
|                   |             |         |              |                                                                                                                                                                                                                                                                                 |                                                      | <35         | 55/410 (13.4%)                               |
|                   |             |         |              |                                                                                                                                                                                                                                                                                 |                                                      | <32         | 21/410 (5.1%)                                |
|                   |             |         |              |                                                                                                                                                                                                                                                                                 |                                                      | <30         | 12/410 (2.9%)                                |
|                   |             |         |              |                                                                                                                                                                                                                                                                                 |                                                      | <28         | 10/410 (2.4%)                                |
| Owen 2001 (37)    | 1997-1999   | USA     | Cohort       | <i>Inclusion:</i> Prior sPTB, singleton<br><i>Exclusion:</i> chronic medical or obstetrical problems, history of                                                                                                                                                                | <32                                                  | <35         | 48/183 (26.2%)                               |
|                   |             |         |              |                                                                                                                                                                                                                                                                                 |                                                      | <32         | 35/183 (19.1%)                               |
|                   |             |         |              |                                                                                                                                                                                                                                                                                 |                                                      | <28         | 29/183 (15.8%)                               |

| Author               | Time Period | Country     | Study Design | Inclusion/Exclusion Criteria                                                                                                                                                             | Gestational Age at Spontaneous Preterm Birth (weeks) |             | Recurrence Rate of Spontaneous Preterm Birth |
|----------------------|-------------|-------------|--------------|------------------------------------------------------------------------------------------------------------------------------------------------------------------------------------------|------------------------------------------------------|-------------|----------------------------------------------|
|                      |             |             |              |                                                                                                                                                                                          | Pregnancy 1                                          | Pregnancy 2 |                                              |
|                      |             |             |              | substance abuse, uterine anomalies, cerclage                                                                                                                                             |                                                      | <24         | 20/183 (10.9%)                               |
| Rittenberg 2009 (38) | 1995-2005   | USA         | Cohort       | <i>Inclusion:</i> Prior sPTB, singleton pregnancies, referred for weekly 17P administration<br><i>Exclusion:</i> Diagnosis of preterm labour, cerclage or vaginal bleeding at enrollment | <37                                                  | <37         | 185/684 (27.0%)                              |
|                      |             |             |              |                                                                                                                                                                                          |                                                      | <35         | 78/684 (11.4%)                               |
|                      |             |             |              |                                                                                                                                                                                          |                                                      | <32         | 30/684 (4.4%)                                |
| Turitz 2016 (39)     | 2009-2013   | USA         | Cohort       | <i>Inclusion:</i> Prior sPTB                                                                                                                                                             | <37                                                  | <37         | 80/218 (36.7%)                               |
| Uquillas 2017 (45)   | 2005-2011   | USA         | Cohort       | <i>Inclusion:</i> Prior sPTB<br><i>Exclusion:</i> Current cerclage, prior iPTB                                                                                                           | <37                                                  | <37         | 43/181 (23.7%)                               |
|                      |             |             |              |                                                                                                                                                                                          |                                                      | <32         | 6/181 (3.3%)                                 |
| Vermeulen 1999 (40)  | 1994-1996   | Netherlands | RCT          | <i>Inclusion:</i> Prior sPTB<br><i>Exclusion:</i> Fetal anomaly, previous iPTB, known allergy to clindamycin                                                                             | <37                                                  | <37         | 41/168 (24.4%)                               |
|                      |             |             |              |                                                                                                                                                                                          |                                                      | <34         | 14/168 (8.3%)                                |
| Vogel 2007 (41)      | 2000-2001   | USA         | Cohort       | <i>Inclusion:</i> Prior sPTB<br><i>Exclusion:</i> Multiple gestations, ruptured membranes, cerclage in a previous pregnancy                                                              | <30                                                  | <37         | 20/62 (32.3%)                                |
|                      |             |             |              |                                                                                                                                                                                          |                                                      | <35         | 15/62 (24.2%)                                |
| Wallace 2016 (42)    | 1986-2013   | UK          | Cohort       |                                                                                                                                                                                          | <37                                                  | <37         | 449/1,900 (23.6%)                            |
| Yamashita 2015 (43)  | 2008-2012   | Japan       | Cohort       | <i>Inclusion:</i> Prior sPTB<br><i>Exclusion:</i> First antenatal visit after                                                                                                            | <37                                                  | <37         | 89/547 (16.3%)                               |
|                      |             |             |              |                                                                                                                                                                                          |                                                      | <34         | 28/547 (5.1%)                                |

| Author         | Time Period | Country | Study Design | Inclusion/Exclusion Criteria                                                                                              | Gestational Age at Spontaneous Preterm Birth (weeks) |             | Recurrence Rate of Spontaneous Preterm Birth |
|----------------|-------------|---------|--------------|---------------------------------------------------------------------------------------------------------------------------|------------------------------------------------------|-------------|----------------------------------------------|
|                |             |         |              |                                                                                                                           | Pregnancy 1                                          | Pregnancy 2 |                                              |
|                |             |         |              | 14 weeks, previous iPTB, placenta previa, placental abruption, multiple gestation, fetal anomaly, antepartum fetal demise |                                                      | <28         | 10/547 (1.8%)                                |
| Yang 2016 (44) | 2005-2011   | USA     | Cohort       |                                                                                                                           | <37                                                  | <37         | 588/1,068 (55.1%)                            |
|                |             |         |              |                                                                                                                           |                                                      | <32         | 71/1,068 (6.6%)                              |
|                |             |         |              |                                                                                                                           | <32                                                  | <32         | 43/177 (24.3%)                               |



Table B2 – Occurrence of Indicated Preterm Birth Following Spontaneous Preterm Birth

| Author            | Time Period | Country | Study Design | Inclusion/Exclusion Criteria                                                                                                                                                                                                                                                                                                                                                                                                                                            | Gestational Age at Preterm Birth (weeks) |             | Occurrence Rate of Indicated Preterm Birth Following a Prior Spontaneous Preterm Birth |
|-------------------|-------------|---------|--------------|-------------------------------------------------------------------------------------------------------------------------------------------------------------------------------------------------------------------------------------------------------------------------------------------------------------------------------------------------------------------------------------------------------------------------------------------------------------------------|------------------------------------------|-------------|----------------------------------------------------------------------------------------|
|                   |             |         |              |                                                                                                                                                                                                                                                                                                                                                                                                                                                                         | Pregnancy 1                              | Pregnancy 2 |                                                                                        |
| Ananth 2006 (14)  | 1989-1997   | USA     | Cohort       | <i>Inclusion:</i> Prior sPTB<br><i>Exclusion:</i> Multiple gestation pregnancies                                                                                                                                                                                                                                                                                                                                                                                        | <37                                      | <37         | 342/12,670 (2.70%)                                                                     |
|                   |             |         |              |                                                                                                                                                                                                                                                                                                                                                                                                                                                                         |                                          | <35         | 121/12,670 (0.96%)                                                                     |
|                   |             |         |              |                                                                                                                                                                                                                                                                                                                                                                                                                                                                         |                                          | <32         | 40/12,670 (0.32%)                                                                      |
|                   |             |         |              |                                                                                                                                                                                                                                                                                                                                                                                                                                                                         | <35                                      | <35         | 121/4,463 (2.71%)                                                                      |
|                   |             |         |              |                                                                                                                                                                                                                                                                                                                                                                                                                                                                         | <32                                      | <32         | 40/2,022 (1.98%)                                                                       |
| Harper 2010 (28)  | 2005-2006   | USA     | RCT          | <i>Inclusion:</i> Prior sPTB, singleton<br><i>Exclusion:</i> Major fetal anomaly, intake of a fish oil supplement >500mg/week at any time during the preceding month, allergy to fish, anticoagulation therapy, hypertension, White's classification D or higher diabetes, drug or alcohol abuse, seizure disorder, uncontrolled thyroid disease, clotting disorder, current or planned cerclage, or a plan to deliver either elsewhere or before 37 weeks of gestation | <37                                      | <37         | 46/852 (5.63%)                                                                         |
| Laughon 2014 (31) | 2002-2010   | USA     | Cohort       | <i>Inclusion:</i> Singleton pregnancies                                                                                                                                                                                                                                                                                                                                                                                                                                 | <37                                      | <37         | 17/3,139 (0.54%)                                                                       |

| Author               | Time Period | Country | Study Design | Inclusion/Exclusion Criteria                                                                                                                                                                                                                                                    | Gestational Age at Preterm Birth (weeks) |             | Occurrence Rate of Indicated Preterm Birth Following a Prior Spontaneous Preterm Birth |
|----------------------|-------------|---------|--------------|---------------------------------------------------------------------------------------------------------------------------------------------------------------------------------------------------------------------------------------------------------------------------------|------------------------------------------|-------------|----------------------------------------------------------------------------------------|
|                      |             |         |              |                                                                                                                                                                                                                                                                                 | Pregnancy 1                              | Pregnancy 2 |                                                                                        |
| Meis 2003 (35)       | 1999-2002   | USA     | RCT          | <i>Inclusion:</i> Prior sPTB<br><i>Exclusion:</i> Multiple gestations, fetal anomaly, progesterone or heparin treatment during the current pregnancy, current or planned cervical cerclage, hypertension requiring medication, seizure disorder, or a plan to deliver elsewhere | <37                                      | <37         | 36/463 (7.78%)                                                                         |
| Owen 2001 (37)       | 1997-1999   | USA     | Cohort       | <i>Inclusion:</i> Prior sPTB, singleton<br><i>Exclusion:</i> chronic medical or obstetrical problems, history of substance abuse, uterine anomalies, cerclage                                                                                                                   | <32                                      | <35         | 5/183 (2.73%)                                                                          |
| Rittenberg 2009 (38) | 1995-2005   | USA     | Cohort       | <i>Inclusion:</i> Prior sPTB, singleton pregnancies, referred for weekly 17P administration<br><i>Exclusion:</i> Diagnosis of preterm labour, cerclage or vaginal bleeding at enrollment                                                                                        | <37                                      | <37         | 84/684 (12.28%)                                                                        |

| Author              | Time Period | Country | Study Design | Inclusion/Exclusion Criteria                                                                                                                                                                            | Gestational Age at Preterm Birth (weeks) |             | Occurrence Rate of Indicated Preterm Birth Following a Prior Spontaneous Preterm Birth |
|---------------------|-------------|---------|--------------|---------------------------------------------------------------------------------------------------------------------------------------------------------------------------------------------------------|------------------------------------------|-------------|----------------------------------------------------------------------------------------|
|                     |             |         |              |                                                                                                                                                                                                         | Pregnancy 1                              | Pregnancy 2 |                                                                                        |
| Yamashita 2015 (43) | 2008-2012   | Japan   | Cohort       | <i>Inclusion:</i> Prior sPTB<br><i>Exclusion:</i> First antenatal visit after 14 weeks, previous iPTB, placenta previa, placental abruption, multiple gestation, fetal anomaly, antepartum fetal demise | <37                                      | <37         | 23/547 (4.20%)                                                                         |

Appendix C: Quality Assessment

Table C1 – Quality Scores for Included Studies

| <b>Author</b>                            | <b>Representatives of the exposed cohort (0, 1)</b> | <b>Selection of the non-exposed cohort (0, 1)</b> | <b>Ascertainment of exposure (0, 1)</b> | <b>Demonstration that outcome of interest was not present at start of study (0, 1)</b> | <b>Comparability of cohorts on the basis of design or analysis (0, 1)</b> | <b>Assessment of outcome (0, 1)</b> | <b>Was follow-up long enough for outcomes to occur (0, 1)</b> | <b>Adequacy of follow-up of cohorts (0, 1)</b> |
|------------------------------------------|-----------------------------------------------------|---------------------------------------------------|-----------------------------------------|----------------------------------------------------------------------------------------|---------------------------------------------------------------------------|-------------------------------------|---------------------------------------------------------------|------------------------------------------------|
| Ananth 2006 (14)<br><i>Score: 4/6</i>    | 1                                                   | N/A                                               | 0                                       | 1                                                                                      | N/A                                                                       | 0                                   | 1                                                             | 1                                              |
| Asrat 1991 (15)<br><i>Score: 5/6</i>     | 0                                                   | N/A                                               | 1                                       | 1                                                                                      | N/A                                                                       | 1                                   | 1                                                             | 1                                              |
| Care 2014 (16)<br><i>Score: 5/6</i>      | 0                                                   | N/A                                               | 1                                       | 1                                                                                      | N/A                                                                       | 1                                   | 1                                                             | 1                                              |
| Carr-Hill 1985 (17)<br><i>Score: 4/6</i> | 1                                                   | N/A                                               | 0                                       | 1                                                                                      | N/A                                                                       | 0                                   | 1                                                             | 1                                              |
| Coleman 2012 (18)<br><i>Score: 5/6</i>   | 0                                                   | N/A                                               | 1                                       | 1                                                                                      | N/A                                                                       | 1                                   | 1                                                             | 1                                              |
| Crane 2008 (19)<br><i>Score: 5/6</i>     | 0                                                   | N/A                                               | 1                                       | 1                                                                                      | N/A                                                                       | 1                                   | 1                                                             | 1                                              |

| Author                                                | Representatives of the exposed cohort (0, 1) | Selection of the non-exposed cohort (0, 1) | Ascertainment of exposure (0, 1) | Demonstration that outcome of interest was not present at start of study (0, 1) | Comparability of cohorts on the basis of design or analysis (0, 1) | Assessment of outcome (0, 1) | Was follow-up long enough for outcomes to occur (0, 1) | Adequacy of follow-up of cohorts (0, 1) |
|-------------------------------------------------------|----------------------------------------------|--------------------------------------------|----------------------------------|---------------------------------------------------------------------------------|--------------------------------------------------------------------|------------------------------|--------------------------------------------------------|-----------------------------------------|
| Drassinower 2015 (20)<br><i>Score: 5/6</i>            | 0                                            | N/A                                        | 1                                | 1                                                                               | N/A                                                                | 1                            | 1                                                      | 1                                       |
| Ekwo 1998 (21)<br><i>Score: 5/6</i>                   | 0                                            | N/A                                        | 1                                | 1                                                                               | N/A                                                                | 1                            | 1                                                      | 1                                       |
| Elimian 2016 (22)<br><i>Score: 7/8</i>                | 0                                            | 1                                          | 1                                | 1                                                                               | 1                                                                  | 1                            | 1                                                      | 1                                       |
| Esplin 2008 (23)<br><i>Score: 4/6</i>                 | 1                                            | N/A                                        | 0                                | 1                                                                               | N/A                                                                | 0                            | 1                                                      | 1                                       |
| Getahun 2010 (24)<br>*PPROM only<br><i>Score: 4/6</i> | 1                                            | N/A                                        | 0                                | 1                                                                               | N/A                                                                | 0                            | 1                                                      | 1                                       |
| Goldenberg 2006 (26)<br><i>Score: 5/6</i>             | 0                                            | N/A                                        | 1                                | 1                                                                               | N/A                                                                | 1                            | 1                                                      | 1                                       |
| Glover 2011 (25)<br><i>Score: 7/8</i>                 | 0                                            | 1                                          | 1                                | 1                                                                               | 1                                                                  | 1                            | 1                                                      | 1                                       |

| Author                                           | Representatives of the exposed cohort (0, 1) | Selection of the non-exposed cohort (0, 1) | Ascertainment of exposure (0, 1) | Demonstration that outcome of interest was not present at start of study (0, 1) | Comparability of cohorts on the basis of design or analysis (0, 1) | Assessment of outcome (0, 1) | Was follow-up long enough for outcomes to occur (0, 1) | Adequacy of follow-up of cohorts (0, 1) |
|--------------------------------------------------|----------------------------------------------|--------------------------------------------|----------------------------------|---------------------------------------------------------------------------------|--------------------------------------------------------------------|------------------------------|--------------------------------------------------------|-----------------------------------------|
| Gonzalez-Quintero 2011 (27)<br><i>Score: 5/6</i> | 0                                            | N/A                                        | 1                                | 1                                                                               | N/A                                                                | 1                            | 1                                                      | 1                                       |
| Harper 2010 (28)<br><i>Score: 7/8</i>            | 0                                            | 1                                          | 1                                | 1                                                                               | 1                                                                  | 1                            | 1                                                      | 1                                       |
| Himes 2008 (29)<br><i>Score: 5/6</i>             | 0                                            | N/A                                        | 1                                | 1                                                                               | N/A                                                                | 1                            | 1                                                      | 1                                       |
| Hsieh 2005 (30)<br><i>Score: 5/6</i>             | 0                                            | N/A                                        | 1                                | 1                                                                               | N/A                                                                | 1                            | 1                                                      | 1                                       |
| Laughon 2014 (31)<br><i>Score: 4/6</i>           | 1                                            | N/A                                        | 0                                | 1                                                                               | N/A                                                                | 0                            | 1                                                      | 1                                       |
| Lykke 2009 (32)<br><i>Score: 4/6</i>             | 1                                            | N/A                                        | 0                                | 1                                                                               | N/A                                                                | 0                            | 1                                                      | 1                                       |
| Manuck 2011 (33)<br><i>Score: 5/6</i>            | 0                                            | N/A                                        | 1                                | 1                                                                               | N/A                                                                | 1                            | 1                                                      | 1                                       |

| <b>Author</b>                             | <b>Representatives of the exposed cohort (0, 1)</b> | <b>Selection of the non-exposed cohort (0, 1)</b> | <b>Ascertainment of exposure (0, 1)</b> | <b>Demonstration that outcome of interest was not present at start of study (0, 1)</b> | <b>Comparability of cohorts on the basis of design or analysis (0, 1)</b> | <b>Assessment of outcome (0, 1)</b> | <b>Was follow-up long enough for outcomes to occur (0, 1)</b> | <b>Adequacy of follow-up of cohorts (0, 1)</b> |
|-------------------------------------------|-----------------------------------------------------|---------------------------------------------------|-----------------------------------------|----------------------------------------------------------------------------------------|---------------------------------------------------------------------------|-------------------------------------|---------------------------------------------------------------|------------------------------------------------|
| Markham 2014 (34)<br><i>Score: 5/6</i>    | 0                                                   | N/A                                               | 1                                       | 1                                                                                      | N/A                                                                       | 1                                   | 1                                                             | 1                                              |
| Meis 2003 (35)<br><i>Score: 7/8</i>       | 0                                                   | 1                                                 | 1                                       | 1                                                                                      | 1                                                                         | 1                                   | 1                                                             | 1                                              |
| Mercer 1999 (36)<br><i>Score: 5/6</i>     | 0                                                   | N/A                                               | 1                                       | 1                                                                                      | N/A                                                                       | 1                                   | 1                                                             | 1                                              |
| Owen 2001 (37)<br><i>Score: 5/6</i>       | 0                                                   | N/A                                               | 1                                       | 1                                                                                      | N/A                                                                       | 1                                   | 1                                                             | 1                                              |
| Rittenberg 2009 (38)<br><i>Score: 5/6</i> | 0                                                   | N/A                                               | 1                                       | 1                                                                                      | N/A                                                                       | 1                                   | 1                                                             | 1                                              |
| Turitz 2016 (39)<br><i>Score: 5/6</i>     | 0                                                   | N/A                                               | 1                                       | 1                                                                                      | N/A                                                                       | 1                                   | 1                                                             | 1                                              |
| Uquillas 2017 (45)<br><i>Score: 5/6</i>   | 0                                                   | N/A                                               | 1                                       | 1                                                                                      | N/A                                                                       | 1                                   | 1                                                             | 1                                              |

| <b>Author</b>                            | <b>Representatives of the exposed cohort (0, 1)</b> | <b>Selection of the non-exposed cohort (0, 1)</b> | <b>Ascertainment of exposure (0, 1)</b> | <b>Demonstration that outcome of interest was not present at start of study (0, 1)</b> | <b>Comparability of cohorts on the basis of design or analysis (0, 1)</b> | <b>Assessment of outcome (0, 1)</b> | <b>Was follow-up long enough for outcomes to occur (0, 1)</b> | <b>Adequacy of follow-up of cohorts (0, 1)</b> |
|------------------------------------------|-----------------------------------------------------|---------------------------------------------------|-----------------------------------------|----------------------------------------------------------------------------------------|---------------------------------------------------------------------------|-------------------------------------|---------------------------------------------------------------|------------------------------------------------|
| Vermeulen 1999 (40)<br><i>Score: 7/8</i> | 0                                                   | 1                                                 | 1                                       | 1                                                                                      | 1                                                                         | 1                                   | 1                                                             | 1                                              |
| Vogel 2007 (41)<br><i>Score: 5/6</i>     | 0                                                   | N/A                                               | 1                                       | 1                                                                                      | N/A                                                                       | 1                                   | 1                                                             | 1                                              |
| Wallace 2016 (42)<br><i>Score: 4/6</i>   | 1                                                   | N/A                                               | 0                                       | 1                                                                                      | N/A                                                                       | 0                                   | 1                                                             | 1                                              |
| Yamashita 2015 (43)<br><i>Score: 5/6</i> | 0                                                   | N/A                                               | 1                                       | 1                                                                                      | N/A                                                                       | 1                                   | 1                                                             | 1                                              |
| Yang 2016 (44)<br><i>Score: 4/6</i>      | 1                                                   | N/A                                               | 0                                       | 1                                                                                      | N/A                                                                       | 0                                   | 1                                                             | 1                                              |
